# Supplementary material
Source: PubMed Central journal article supplement (PMC8385642)
Supplement: NIHMS1729999-supplement-1.pdf [file NIHMS1729999-supplement-1.pdf]

**Supplemental Table 1.** Univariate analysis of recurrence-free survival

| <b>Variable</b>                                     | <b>Hazard Ratio<br/>(95% CI)</b> | <b>p value</b> |
|-----------------------------------------------------|----------------------------------|----------------|
| <b>Age at liver resection</b>                       | 1 (0.99-1.01)                    | 0.687          |
| <b>Body mass index</b>                              | 0.99 (0.96-1.02)                 | 0.549          |
| <b>Number of resected liver segments</b>            | 1.13 (1.02-1.25)                 | 0.014          |
| <b>Adjuvant treatment group</b>                     |                                  | 0.046          |
| HAIC+Sys                                            | 1                                |                |
| Sys                                                 | 1.53 (1.07-2.18)                 |                |
| Surgery alone                                       | 1.41 (0.99-2.02)                 |                |
| <b>Sex</b>                                          |                                  | 0.917          |
| Male                                                | 1                                |                |
| Female                                              | 1.02 (0.76-1.35)                 |                |
| <b>Location of primary</b>                          |                                  | 0.017          |
| Right colon                                         | 1                                |                |
| Left colon                                          | 0.6 (0.41-0.86)                  |                |
| Rectum                                              | 0.76 (0.5-1.15)                  |                |
| <b>Nodal status of primary</b>                      |                                  | 0.143          |
| N1                                                  | 1                                |                |
| N2                                                  | 1.25 (0.93-1.69)                 |                |
| <b>Type of chemotherapy after primary resection</b> |                                  | 0.215          |
| 5-FU alone                                          | 1                                |                |
| 5-FU + oxaliplatin/irinotecan                       | 1.23 (0.89-1.71)                 |                |
| <b>CRS</b>                                          |                                  | <0.001         |
| Low risk (0-3)                                      | 1                                |                |
| High risk (4-5)                                     | 2.37 (1.5-3.74)                  |                |
| <b>Disease-free interval (DFI)</b>                  |                                  | 0.127          |
| ≥12 months                                          | 1                                |                |
| <12 months                                          | 1.25 (0.94-1.66)                 |                |
| <b>Number of liver tumors</b>                       |                                  | 0.004          |
| Single lesion                                       | 1                                |                |
| Multiple lesions                                    | 1.53 (1.15-2.04)                 |                |
| <b>Largest CLM tumor size</b>                       |                                  | 0.002          |
| ≤5 cm                                               | 1                                |                |
| >5 cm                                               | 1.67 (1.19-2.33)                 |                |
| <b>CEA prior to hepatectomy</b>                     |                                  | 0.014          |
| ≤200 µg/L                                           | 1                                |                |
| >200 µg/L                                           | 2.01 (1.14-3.54)                 |                |
| <b>Neoadjuvant chemotherapy prior hepatectomy</b>   |                                  | 0.131          |
| No                                                  | 1                                |                |
| Yes                                                 | 1.36 (0.91-2.04)                 |                |
| <b>Surgical era</b>                                 |                                  | 0.802          |
| 1992-2001                                           | 1                                |                |

2002-2014

1.04 (0.77-1.39)

HAIC=hepatic arterial infusion chemotherapy; Sys=systemic chemotherapy; 5-FU=5-fluorouracil;

CRS=clinical risk score; CLM=colorectal liver metastasis; CEA=carcinoembryonic antigen

Journal Pre-proof

**Supplemental Table 2.** Univariate analysis of overall survival

| <b>Variable</b>                                     | <b>Hazard Ratio<br/>(95% CI)</b> | <b><i>p</i> value</b> |
|-----------------------------------------------------|----------------------------------|-----------------------|
| <b>Age at liver resection</b>                       | 1.01 (1-1.02)                    | 0.227                 |
| <b>Body mass index</b>                              | 0.98 (0.95-1.02)                 | 0.315                 |
| <b>Number of resected liver segments</b>            | 1.1 (0.99-1.23)                  | 0.063                 |
| <b>Adjuvant treatment group</b>                     |                                  | 0.008                 |
| HAIC+Sys                                            | 1                                |                       |
| Sys                                                 | 1.71 (1.17-2.49)                 |                       |
| Surgery alone                                       | 1.7 (1.15-2.5)                   |                       |
| <b>Sex</b>                                          |                                  | 0.271                 |
| Male                                                | 1                                |                       |
| Female                                              | 1.19 (0.87-1.62)                 |                       |
| <b>Location of primary</b>                          |                                  | 0.037                 |
| Right Colon                                         | 1                                |                       |
| Left Colon                                          | 0.61 (0.41-0.89)                 |                       |
| Rectum                                              | 0.73 (0.46-1.14)                 |                       |
| <b>Nodal status of primary</b>                      |                                  | 0.363                 |
| N1                                                  | 1                                |                       |
| N2                                                  | 1.16 (0.84-1.61)                 |                       |
| <b>Type of chemotherapy after primary resection</b> |                                  | 0.362                 |
| 5-FU alone                                          | 1                                |                       |
| 5-FU + Oxaliplatin/Irinotecan                       | 0.84 (0.57-1.23)                 |                       |
| <b>CRS</b>                                          |                                  | <0.001                |
| Low risk (0-3)                                      | 1                                |                       |
| High risk (4-5)                                     | 2.44 (1.52-3.9)                  |                       |
| <b>Disease-free interval (DFI)</b>                  |                                  | 0.715                 |
| ≥12 months                                          | 1                                |                       |
| <12 months                                          | 1.06 (0.78-1.44)                 |                       |
| <b>Number of liver tumors</b>                       |                                  | 0.073                 |
| Single lesion                                       | 1                                |                       |
| Multiple lesions                                    | 1.32 (0.97-1.8)                  |                       |
| <b>Largest CLM tumor size</b>                       |                                  | <0.001                |
| ≤5 cm                                               | 1                                |                       |
| >5 cm                                               | 1.84 (1.3-2.6)                   |                       |
| <b>CEA prior to hepatectomy</b>                     |                                  | 0.019                 |
| ≤200 μg/L                                           | 1                                |                       |
| >200 μg/L                                           | 2 (1.11-3.61)                    |                       |
| <b>Neoadjuvant chemotherapy prior hepatectomy</b>   |                                  | 0.725                 |
| No                                                  | 1                                |                       |
| Yes                                                 | 0.92 (0.59-1.45)                 |                       |
| <b>Surgical era</b>                                 |                                  | 0.153                 |
| 1992-2001                                           | 1                                |                       |

2002-2014

0.79 (0.57-1.09)

HAIC=hepatic arterial infusion chemotherapy; Sys=systemic chemotherapy; 5-FU=5-fluorouracil;

CRS=clinical risk score; CLM=colorectal liver metastasis; CEA=carcinoembryonic antigen

Journal Pre-proof
